# Supplementary material for: Avarol Induces Apoptosis in Pancreatic Ductal Adenocarcinoma Cells by Activating PERK–eIF2α–CHOP Signaling
Source: PubMed Central journal article supplement (PMC4413216; doi:10.3390/md13042376), 2015-04-16
Supplement: marinedrugs-13-02376-s001.pdf [file marinedrugs-13-02376-s001.pdf]

## Supplementary Information

**Table S1.** Cytotoxic effects of various marine metabolites for MEF, MCF7 and PK1 cells. These cells were treated with indicated marine metabolites at the indicated concentrations for 24 h. Data are presented as the average of two independently performed experiments.

|                              | Cell Viability (%) |      |     |
|------------------------------|--------------------|------|-----|
|                              | MEF                | MCF7 | PK1 |
| aaptamine (100 $\mu$ M)      | 94                 | 98   | 91  |
| ara-a (100 $\mu$ M)          | 100                | 93   | 90  |
| avarol (40 $\mu$ M)          | 91                 | 75   | 25  |
| chitin (20 $\mu$ g/mL)       | 100                | 100  | 100 |
| chartreusin (100 $\mu$ M)    | 48                 | 20   | 26  |
| K252c (50 $\mu$ M)           | 37                 | 25   | 19  |
| linezolid (100 $\mu$ M)      | 100                | 94   | 92  |
| manumycin A (40 $\mu$ M)     | 74                 | 43   | 52  |
| phloroglucinol (100 $\mu$ M) | 95                 | 83   | 92  |
| piericidin (100 $\mu$ M)     | 84                 | 74   | 60  |
| prodigiosin (15 $\mu$ M)     | 60                 | 26   | 28  |
| resistomycin (8 $\mu$ M)     | 83                 | 51   | 48  |

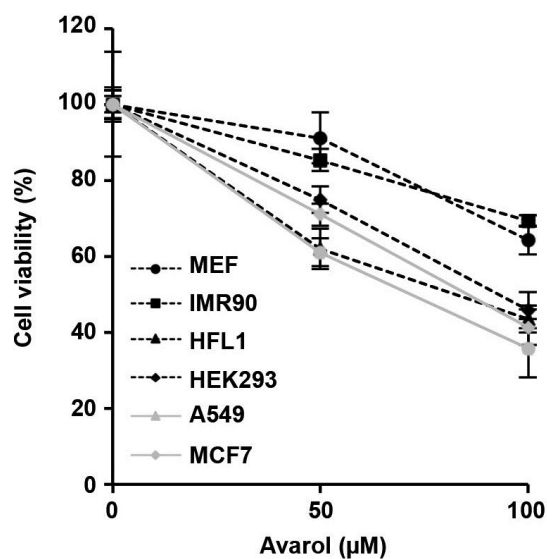

**Figure S1.** MEF, IMR90, HFL1, HEK293, A549 and MCF7 cells were incubated with avarol at the indicated concentrations for 24 h. Data are presented as the mean  $\pm$  standard deviation (SD) of three simultaneously performed experiments. Cell viability was determined using MTT assays.
